# Supplementary material for: The Pre-Polarization and Concentration of Cells near Micro-Electrodes Using AC Electric Fields Enhances the Electrical Cell Lysis in a Sessile Drop
Source: MDPI journal article supplement (doi:10.3390/bios15010022), 2025-01-06
Supplement: s1 [file s1]

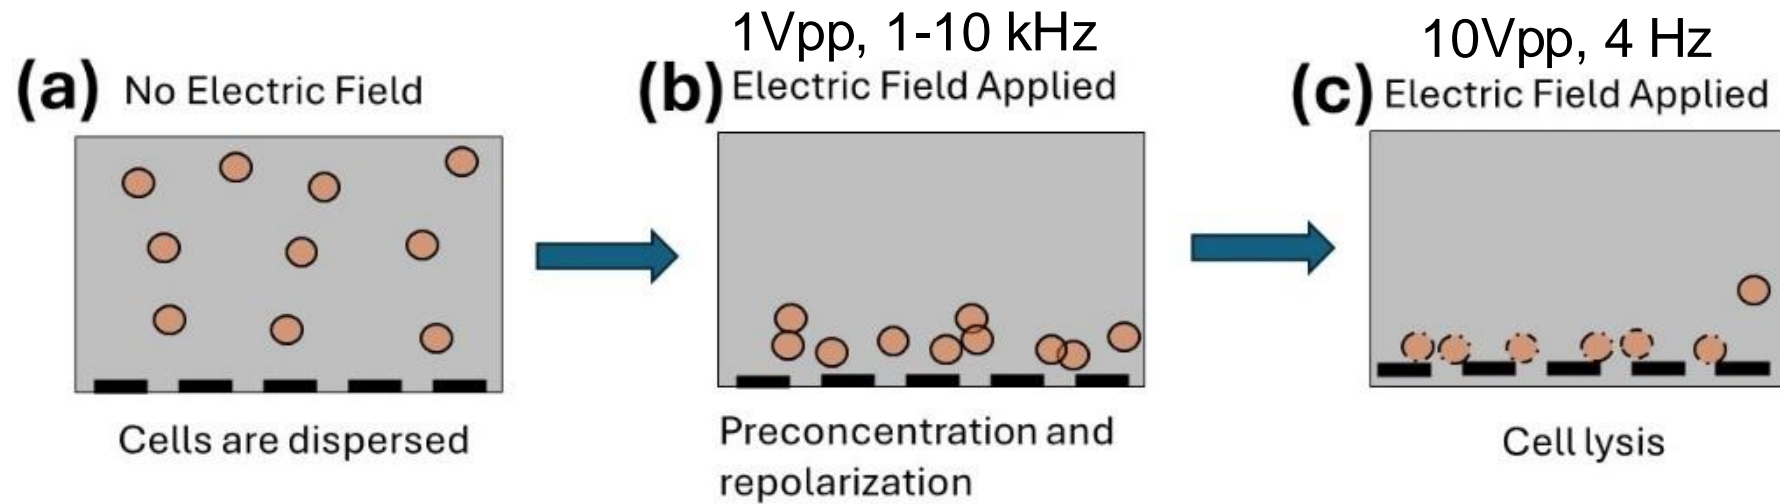

**Supplementary figure S1**

Experimental steps used in the study. **(a)** First cells were pipetted on the electrode and formed a sessile drop. **(b)** Cells were pre-concentrated and pre-polarized. **(c)** Cells were lysed using electric fields.
